# Supplementary material for: Forming new sex partnerships while overseas: findings from the third British National Survey of Sexual Attitudes & Lifestyles (Natsal-3)
Source: PubMed Central journal article supplement (PMC5013104; doi:10.1136/sextrans-2015-052459), 2016-06-06
Supplement: sextrans-2015-052459supp.pdf [file sextrans-2015-052459supp.pdf]

**Web Appendix 1: Variations in the % of men reporting new sexual partner(s) while overseas in the past five years by key demographics and sexual and health behaviours**

|                                                                  |                                                            | <b>% (95%CI)</b>  | <b>Crude OR (95%CI)</b> | <b>p-value</b> | <b>AOR<sup>1</sup> (95%CI)</b> | <b>p-value</b> | <b>Denom. (unwt, wt)<sup>2</sup></b> |
|------------------------------------------------------------------|------------------------------------------------------------|-------------------|-------------------------|----------------|--------------------------------|----------------|--------------------------------------|
| <b>All men</b>                                                   |                                                            | 9.2% (8.3-10.1)   |                         |                |                                |                | 5243, 6426                           |
| <b>Socio-demographic variables</b>                               |                                                            |                   |                         |                |                                |                |                                      |
| <b>Age (years)</b>                                               |                                                            |                   |                         | <0.0001        |                                | 0.321          |                                      |
|                                                                  | 16-24                                                      | 16.9% (14.8-19.2) | 1 -                     |                | 1 -                            |                | 1354, 988                            |
|                                                                  | 25-34                                                      | 14.4% (12.6-16.5) | 0.83 (0.67-1.03)        |                | 1.14 (0.86-1.50)               |                | 1431, 1282                           |
|                                                                  | 35-44                                                      | 7.6% (5.8-10.0)   | 0.41 (0.29-0.56)        |                | 1.06 (0.72-1.56)               |                | 761, 1354                            |
|                                                                  | 45-54                                                      | 6.1% (4.4-8.4)    | 0.32 (0.22-0.47)        |                | 0.94 (0.60-1.48)               |                | 696, 1282                            |
|                                                                  | 55-64                                                      | 3.5% (2.2-5.4)    | 0.18 (0.11-0.29)        |                | 0.64 (0.36-1.11)               |                | 591, 953                             |
|                                                                  | 65-74                                                      | 4.2% (2.5-6.9)    | 0.22 (0.13-0.38)        |                | 1.19 (0.62-2.30)               |                | 410, 567                             |
| <b>Relationship status</b>                                       |                                                            |                   |                         | <0.0001        |                                | 0.5308         |                                      |
|                                                                  | Married/civil partnership                                  | 4.6% (3.7-5.7)    | 1 -                     |                | 1 -                            |                | 1960, 3432                           |
|                                                                  | Living with partner                                        | 9.7% (7.8-12.1)   | 2.26 (1.62-3.15)        |                | 0.97 (0.64-1.47)               |                | 857, 1028                            |
|                                                                  | In a 'steady' ongoing relationship but not living together | 14.5% (12.1-17.4) | 3.56 (2.62-4.86)        |                | 0.97 (0.64-1.46)               |                | 956, 765                             |
|                                                                  | Not in a 'steady' relationship                             | 18.6% (16.3-21.1) | 4.79 (3.64-6.31)        |                | 1.17 (0.80-1.72)               |                | 1454, 1186                           |
| <b>Ethnicity</b>                                                 |                                                            |                   |                         | <0.0001        |                                | <0.0001        |                                      |
|                                                                  | White British                                              | 7.8% (7.0-8.6)    | 1 -                     |                | 1 -                            |                | 4430, 5354                           |
|                                                                  | White Other                                                | 20.3% (15.1-26.8) | 3.02 (2.07-4.40)        |                | 2.38 (1.49-3.80)               |                | 268, 335                             |
|                                                                  | Mixed                                                      | 13.8% (7.8-23.2)  | 1.9 (1.00-3.60)         |                | 1.1 (0.58-2.09)                |                | 100, 104                             |
|                                                                  | Asian/Asian British                                        | 11.6% (7.9-16.6)  | 1.55 (1.01-2.38)        |                | 1.99 (1.22-3.25)               |                | 226, 352                             |
|                                                                  | Black/Black British                                        | 16.4% (10.8-24.2) | 2.33 (1.42-3.83)        |                | 1.25 (0.70-2.23)               |                | 154, 200                             |
|                                                                  | Chinese/Other                                              | 26.9% (15.4-42.6) | 4.36 (2.18-8.73)        |                | 4.57 (1.97-10.60)              |                | 56, 67                               |
| <b>NSSEC code (individual socio-economic status)<sup>3</sup></b> |                                                            |                   |                         | <0.0001        |                                | 0.1928         |                                      |
|                                                                  | Managerial & prof occupations                              | 9.1% (7.7-10.7)   | 1 -                     |                | 1 -                            |                | 1731, 2445                           |
|                                                                  | Intermediate occupations                                   | 7.9% (6.2-9.9)    | 0.85 (0.63-1.16)        |                | 0.77 (0.55-1.09)               |                | 824, 1100                            |
|                                                                  | Semi-routine/routine occupations                           | 9.4% (8.0-10.9)   | 1.03 (0.81-1.32)        |                | 0.8 (0.60-1.05)                |                | 1803, 2077                           |
|                                                                  | No job(10+ hrs/week) or not in last 10                     | 4.0% (2.2-7.3)    | 0.42 (0.22-0.80)        |                | 0.47 (0.22-0.99)               |                | 286, 316                             |

|                                                           |                       |       |             |       |               |         |       |               |            |
|-----------------------------------------------------------|-----------------------|-------|-------------|-------|---------------|---------|-------|---------------|------------|
|                                                           | years                 |       |             |       |               |         |       |               |            |
| Student in full-time education                            |                       | 15.7% | (12.5-19.6) | 1.86  | (1.37-2.53)   |         | 0.79  | (0.54-1.17)   | 582, 468   |
| <b>Resident in Greater London</b>                         |                       |       |             |       |               | 0.0001  |       | 0.168         |            |
|                                                           | No                    | 8.4%  | (7.6-9.3)   | 1     | -             |         | 1     | -             | 4717, 5590 |
|                                                           | Yes                   | 14.3% | (11.2-18.2) | 1.82  | (1.34-2.48)   |         | 1.28  | (0.90-1.82)   | 526, 836   |
| <b>Sexual behaviours</b>                                  |                       |       |             |       |               |         |       |               |            |
| <b>No. of sexual partners, past five years</b>            |                       |       |             |       |               | <0.0001 |       | <0.0001       |            |
|                                                           | 1                     | 2.3%  | (1.8-3.0)   | 1     | -             |         | 1     | -             | 2632, 3931 |
|                                                           | 2-4                   | 10.3% | (8.6-12.2)  | 4.77  | (3.42-6.64)   |         | 4.45  | (3.01-6.56)   | 1435, 1457 |
|                                                           | 5-9                   | 27.6% | (23.7-31.9) | 15.89 | (11.43-22.09) |         | 14.08 | (9.32-21.28)  | 646, 561   |
|                                                           | 10+                   | 42.2% | (37.1-47.4) | 30.39 | (21.55-42.86) |         | 26.64 | (17.44-40.70) | 512, 456   |
| <b>Overlap between partners, past five years</b>          |                       |       |             |       |               | <0.0001 |       | 0.0176        |            |
|                                                           | No                    | 5.6%  | (4.9-6.4)   | 1     | -             |         | 1     | -             | 4176, 5345 |
|                                                           | Yes                   | 27.4% | (24.2-30.9) | 6.38  | (5.13-7.93)   |         | 1.37  | (1.06-1.78)   | 1058, 1066 |
| <b>Same sex partners, past five years</b>                 |                       |       |             |       |               | <0.0001 |       | 0.1158        |            |
|                                                           | No                    | 8.8%  | (7.9-9.7)   | 1     | -             |         | 1     | -             | 5054, 6236 |
|                                                           | Yes, only same sex    | 27.8% | (18.3-39.9) | 4.01  | (2.34-6.88)   |         | 1.46  | (0.81-2.63)   | 106, 103   |
|                                                           | Yes, and opposite sex | 18.6% | (10.5-30.9) | 2.38  | (1.22-4.64)   |         | 0.61  | (0.32-1.17)   | 76, 79     |
| <b>1+ new unprotected partner, past year</b>              |                       |       |             |       |               | <0.0001 |       | 0.2509        |            |
|                                                           | No                    | 7.2%  | (6.4-8.1)   | 1     | -             |         | 1     | -             | 4233, 5452 |
|                                                           | Yes                   | 20.9% | (18.0-24.2) | 3.41  | (2.73-4.27)   |         | 1.17  | (0.90-1.52)   | 963, 918   |
| <b>Paid for sex, past five years</b>                      |                       |       |             |       |               | <0.0001 |       | <0.0001       |            |
|                                                           | No                    | 7.2%  | (6.5-8.0)   | 1     | -             |         | 1     | -             | 5015, 6176 |
|                                                           | Yes                   | 57.6% | (49.6-65.2) | 17.45 | (12.47-24.42) |         | 6.71  | (4.36-10.34)  | 227, 249   |
| <b>Ever paid money for sex outside the UK</b>             |                       |       |             |       |               | <0.0001 |       | <0.0001       |            |
|                                                           | No                    | 7.3%  | (6.5-8.1)   | 1     | -             |         | 1     | -             | 4884, 5961 |
|                                                           | Yes                   | 33.4% | (28.0-39.4) | 6.39  | (4.84-8.43)   |         | 5.46  | (3.92-7.59)   | 359, 465   |
| <b>New partner in UK from outside UK, past five years</b> |                       |       |             |       |               | <0.0001 |       | <0.0001       |            |
|                                                           | No                    | 7.6%  | (6.8-8.5)   | 1     | -             |         | 1     | -             | 4951, 6153 |
|                                                           | Yes                   | 44.5% | (37.8-51.5) | 9.74  | (7.17-13.21)  |         | 2.64  | (1.88-3.71)   | 291, 272   |
| <b>Health behaviours</b>                                  |                       |       |             |       |               |         |       |               |            |
| <b>Smoker</b>                                             |                       |       |             |       |               | 0.001   |       | 0.2202        |            |

|                                                            |                                |       |             |      |             |         |             |            |  |
|------------------------------------------------------------|--------------------------------|-------|-------------|------|-------------|---------|-------------|------------|--|
|                                                            | No                             | 8.3%  | (7.4-9.3)   | 1    | -           | 1       | -           | 3629, 4678 |  |
|                                                            | Yes                            | 11.5% | (9.8-13.5)  | 1.44 | (1.16-1.79) | 0.85    | (0.66-1.10) | 1614, 1747 |  |
| <b>Average alcoholic consumption, per week<sup>4</sup></b> |                                |       |             |      |             | 0.0037  |             | 0.0473     |  |
|                                                            | None                           | 6.7%  | (5.1-8.8)   | 1    | -           | 1       | -           | 961, 1216  |  |
|                                                            | Not more than recommended      | 9.4%  | (8.5-10.5)  | 1.45 | (1.06-1.98) | 1.29    | (0.90-1.84) | 3785, 4613 |  |
|                                                            | More than recommended          | 12.6% | (9.8-16.1)  | 2    | (1.33-3.00) | 1.81    | (1.12-2.91) | 474, 573   |  |
| <b>Drug use, past year</b>                                 |                                |       |             |      |             | <0.0001 |             | 0.0118     |  |
|                                                            | No                             | 7.3%  | (6.5-8.2)   | 1    | -           | 1       | -           | 4107, 5358 |  |
|                                                            | Yes, cannabis only             | 13.9% | (11.1-17.2) | 2.05 | (1.54-2.73) | 1.01    | (0.73-1.39) | 618, 583   |  |
|                                                            | Yes, drugs other than cannabis | 24.4% | (20.3-28.9) | 4.08 | (3.16-5.28) | 1.52    | (1.15-2.03) | 504, 466   |  |
| <b>Sexual health outcomes</b>                              |                                |       |             |      |             |         |             |            |  |
| <b>Attended sexual health clinic, past five years</b>      |                                |       |             |      |             | <0.0001 |             | 0.1747     |  |
|                                                            | No                             | 6.9%  | (6.1-7.8)   | 1    | -           | 1       | -           | 4255, 5563 |  |
|                                                            | Yes                            | 24.2% | (20.9-27.7) | 4.28 | (3.41-5.37) | 1.21    | (0.92-1.59) | 909, 778   |  |
| <b>HIV test, past five years</b>                           |                                |       |             |      |             | <0.0001 |             | 0.0005     |  |
|                                                            | Not in past five years/never   | 7.2%  | (6.4-8.1)   | 1    | -           | 1       | -           | 4276, 5392 |  |
|                                                            | In past five years             | 23.8% | (20.4-27.5) | 4.02 | (3.19-5.07) | 1.59    | (1.23-2.06) | 719, 744   |  |
| <b>STI diagnosis, past five years</b>                      |                                |       |             |      |             | <0.0001 |             | 0.241      |  |
|                                                            | No                             | 8.3%  | (7.4-9.2)   | 1    | -           | 1       | -           | 4905, 6095 |  |
|                                                            | Yes                            | 28.4% | (22.7-35.0) | 4.41 | (3.19-6.09) | 1.24    | (0.86-1.79) | 278, 256   |  |
| <b>Risk perception</b>                                     |                                |       |             |      |             |         |             |            |  |
| <b>HIV/AIDS risk: to self</b>                              |                                |       |             |      |             | <0.0001 |             | 0.1993     |  |
|                                                            | Greatly at risk / quite a lot  | 15.6% | (11.1-21.5) | 2.66 | (1.76-4.03) | 0.85    | (0.51-1.41) | 215, 206   |  |
|                                                            | Not very much                  | 17.4% | (15.1-20.0) | 3.05 | (2.47-3.77) | 1.2     | (0.94-1.53) | 1372, 1400 |  |
|                                                            | Not at all at risk             | 6.5%  | (5.7-7.4)   | 1    | -           | 1       | -           | 3628, 4788 |  |
| <b>Other STI risk: to self</b>                             |                                |       |             |      |             | <0.0001 |             | 0.0879     |  |
|                                                            | Greatly at risk / quite a lot  | 24.7% | (19.1-31.1) | 5.38 | (3.78-7.65) | 1.13    | (0.75-1.70) | 281, 243   |  |
|                                                            | Not very much                  | 17.2% | (15.0-19.6) | 3.41 | (2.75-4.24) | 1.33    | (1.03-1.72) | 1496, 1522 |  |
|                                                            | Not at all at risk             | 5.7%  | (5.0-6.6)   | 1    | -           | 1       | -           | 3440, 4630 |  |

<sup>1</sup> Adjusted ORs adjusted for age (continuous), relationship status, ethnicity (White British vs. Other), social class, place of residence in Britain & partners in the past five years

<sup>2</sup> Denominators are for crude ORs

<sup>3</sup> NSSEC = National Statistics Socio-Economic Classification.[12]

<sup>4</sup> Recommended alcohol limits 21 units/week for men and 14 units/week for women -as defined by Royal College of Physicians [13]

**Web Appendix 2: Variations in the % of women reporting new sexual partner(s) while overseas in the past five years by key demographics and sexual and health behaviours**

|                                                                  | %     | (95%CI)     | Crude OR | (95%CI)     | p-value | AOR <sup>1</sup> | (95%CI)     | p-value | Denom.<br>(unwt, wt) <sup>2</sup> |
|------------------------------------------------------------------|-------|-------------|----------|-------------|---------|------------------|-------------|---------|-----------------------------------|
| <b>All women</b>                                                 | 5.3%  | (4.8-5.8)   |          |             |         |                  |             |         | 7257, 6275                        |
| <b>Socio-demographics</b>                                        |       |             |          |             |         |                  |             |         |                                   |
| <b>Age (years)</b>                                               |       |             |          |             | <0.0001 |                  |             | 0.0001  |                                   |
| 16-24                                                            | 12.3% | (10.6-14.3) | 1        | -           |         | 1                | -           |         | 1719, 959                         |
| 25-34                                                            | 9.4%  | (8.2-10.8)  | 0.74     | (0.59-0.93) |         | 1.31             | (0.96-1.78) |         | 2353, 1301                        |
| 35-44                                                            | 2.5%  | (1.8-3.5)   | 0.18     | (0.12-0.27) |         | 0.51             | (0.31-0.84) |         | 1139, 1378                        |
| 45-54                                                            | 2.2%  | (1.5-3.4)   | 0.16     | (0.10-0.26) |         | 0.61             | (0.37-1.00) |         | 965, 1278                         |
| 55-64                                                            | 1.8%  | (1.1-3.0)   | 0.13     | (0.08-0.23) |         | 0.71             | (0.38-1.33) |         | 694, 891                          |
| 65-74                                                            | 2.3%  | (1.1-4.6)   | 0.17     | (0.08-0.35) |         | 1.12             | (0.48-2.57) |         | 387, 468                          |
| <b>Relationship status</b>                                       |       |             |          |             | <0.0001 |                  |             | 0.1163  |                                   |
| Married/civil partnership                                        | 2.3%  | (1.8-2.9)   | 1        | -           |         | 1                | -           |         | 2843, 3370                        |
| Living with partner                                              | 5.2%  | (4.1-6.7)   | 2.37     | (1.67-3.36) |         | 1.03             | (0.71-1.50) |         | 1294, 1023                        |
| In a 'steady' ongoing relationship but not living together       | 9.3%  | (7.7-11.2)  | 4.4      | (3.21-6.01) |         | 1.12             | (0.77-1.62) |         | 1369, 794                         |
| Not in a 'steady' relationship                                   | 11.7% | (10.0-13.6) | 5.67     | (4.24-7.57) |         | 1.42             | (1.00-2.00) |         | 1736, 1081                        |
| <b>Ethnicity</b>                                                 |       |             |          |             | <0.0001 |                  |             | <0.0001 |                                   |
| White British                                                    | 4.4%  | (3.9-5.0)   | 1        | -           |         | 1                | -           |         | 6082, 5247                        |
| White Other                                                      | 11.7% | (8.6-15.8)  | 2.85     | (1.97-4.14) |         | 2.65             | (1.75-4.02) |         | 390, 346                          |
| Mixed                                                            | 8.5%  | (4.5-15.8)  | 2.01     | (1.00-4.04) |         | 0.88             | (0.40-1.92) |         | 170, 120                          |
| Asian/Asian British                                              | 10.3% | (7.3-14.5)  | 2.48     | (1.63-3.77) |         | 3.91             | (2.40-6.37) |         | 300, 279                          |
| Black/Black British                                              | 5.4%  | (2.8-10.1)  | 1.22     | (0.61-2.42) |         | 0.82             | (0.38-1.77) |         | 217, 201                          |
| Chinese/Other                                                    | 10.3% | (5.1-19.8)  | 2.48     | (1.16-5.31) |         | 3.17             | (1.49-6.71) |         | 84, 69                            |
| <b>NSSEC code (individual socio-economic status)<sup>3</sup></b> |       |             |          |             | <0.0001 |                  |             | 0.0297  |                                   |
| Managerial & prof occupations                                    | 5.4%  | (4.5-6.4)   | 1        | -           |         | 1                | -           |         | 2174, 2070                        |
| Intermediate occupations                                         | 4.6%  | (3.6-5.9)   | 0.84     | (0.61-1.16) |         | 0.77             | (0.55-1.09) |         | 1460, 1307                        |
| Semi-routine/routine occupations                                 | 4.8%  | (4.0-5.9)   | 0.89     | (0.67-1.19) |         | 0.68             | (0.50-0.93) |         | 2084, 1685                        |

|                                                            |       |             |       |               |         |               |            |
|------------------------------------------------------------|-------|-------------|-------|---------------|---------|---------------|------------|
| No job(10+ hrs/week) or not in last 10 years               | 2.7%  | (1.8-4.2)   | 0.49  | (0.30-0.80)   | 0.48    | (0.28-0.83)   | 771, 732   |
| Student in full-time education                             | 12.2% | (9.4-15.6)  | 2.44  | (1.71-3.48)   | 0.83    | (0.56-1.25)   | 729, 446   |
| <b>Resident in Greater London</b>                          |       |             |       |               | <0.0001 | 0.0309        |            |
| No                                                         | 4.7%  | (4.2-5.2)   | 1     | -             | 1       | -             | 6488, 5479 |
| Yes                                                        | 9.5%  | (7.6-11.8)  | 2.16  | (1.65-2.82)   | 1.43    | (1.03-1.97)   | 769, 796   |
| <b>Sexual behaviours</b>                                   |       |             |       |               |         |               |            |
| <b>No. of sexual partners, past five years</b>             |       |             |       |               | <0.0001 | <0.0001       |            |
| 1                                                          | 1.9%  | (1.5-2.4)   | 1     | -             | 1       | -             | 4342, 4427 |
| 2-4                                                        | 7.2%  | (6.0-8.6)   | 3.98  | (2.93-5.41)   | 3.19    | (2.24-4.56)   | 1893, 1249 |
| 5-9                                                        | 23.3% | (19.7-27.5) | 15.58 | (11.35-21.38) | 11.32   | 17.07)        | 658, 391   |
| 10+                                                        | 33.6% | (27.9-39.9) | 25.93 | (18.22-36.90) | 21.33   | (13.95-32.60) | 338, 186   |
| <b>Overlap between partners, past five years</b>           |       |             |       |               | <0.0001 | 0.0033        |            |
| No                                                         | 3.7%  | (3.3-4.2)   | 1     | -             | 1       | -             | 6337, 5692 |
| Yes                                                        | 20.6% | (17.8-23.7) | 6.66  | (5.34-8.29)   | 1.48    | (1.14-1.91)   | 899, 564   |
| <b>Same sex partners, past five years</b>                  |       |             |       |               | <0.0001 | 0.5299        |            |
| No                                                         | 5.0%  | (4.5-5.5)   | 1     | -             | 1       | -             | 6906, 6033 |
| Yes, only same sex                                         | 2.2%  | (0.7-7.1)   | 0.43  | (0.13-1.46)   | 0.49    | (0.14-1.75)   | 79, 66     |
| Yes, and opposite sex                                      | 17.3% | (12.5-23.5) | 4.01  | (2.69-5.97)   | 0.93    | (0.61-1.44)   | 263, 170   |
| <b>1+ new unprotected partner, past year</b>               |       |             |       |               | <0.0001 | 0.5389        |            |
| No                                                         | 4.3%  | (3.8-4.8)   | 1     | -             | 1       | -             | 5996, 5455 |
| Yes                                                        | 12.6% | (10.6-14.9) | 3.23  | (2.56-4.08)   | 0.91    | (0.69-1.22)   | 1214, 775  |
| <b>New partner in UK from outside UK, past five years</b>  |       |             |       |               | <0.0001 | <0.0001       |            |
| No                                                         | 4.5%  | (4.0-5.0)   | 1     | -             | 1       | -             | 7025, 6106 |
| Yes                                                        | 34.1% | (27.1-41.8) | 11.05 | (7.83-15.60)  | 4.3     | (2.69-6.88)   | 227, 165   |
| <b>Health behaviours</b>                                   |       |             |       |               |         |               |            |
| <b>Smoker</b>                                              |       |             |       |               | 0.0003  | 0.2827        |            |
| No                                                         | 4.7%  | (4.2-5.4)   | 1     | -             | 1       | -             | 5166, 4744 |
| Yes                                                        | 6.9%  | (5.9-8.1)   | 1.49  | (1.20-1.84)   | 0.88    | (0.69-1.11)   | 2091, 1531 |
| <b>Average alcoholic consumption, per week<sup>4</sup></b> |       |             |       |               | <0.0001 | 0.0252        |            |
| None                                                       | 4.1%  | (3.3-5.1)   | 1     | -             | 1       | -             | 2182, 1896 |

|                                                       |                                |       |             |      |             |         |      |             |            |
|-------------------------------------------------------|--------------------------------|-------|-------------|------|-------------|---------|------|-------------|------------|
|                                                       | Not more than recommended      | 5.0%  | (4.3-5.7)   | 1.21 | (0.92-1.59) |         | 1.09 | (0.81-1.46) | 4161, 3624 |
|                                                       | More than recommended          | 9.8%  | (8.0-12.0)  | 2.53 | (1.86-3.45) |         | 1.49 | (1.09-2.04) | 885, 733   |
| <b>Drug use, past year</b>                            |                                |       |             |      |             | <0.0001 |      |             | 0.0245     |
|                                                       | No                             | 4.2%  | (3.8-4.8)   | 1    | -           |         | 1    | -           | 6475, 5775 |
|                                                       | Yes, cannabis only             | 15.6% | (11.8-20.3) | 4.18 | (2.95-5.91) |         | 1.52 | (1.02-2.25) | 431, 281   |
|                                                       | Yes, drugs other than cannabis | 19.9% | (15.3-25.3) | 5.61 | (3.97-7.93) |         | 1.64 | (1.08-2.47) | 337, 207   |
| <b>Sexual health outcomes</b>                         |                                |       |             |      |             |         |      |             |            |
| <b>Attended sexual health clinic, past five years</b> |                                |       |             |      |             | <0.0001 |      |             | 0.0059     |
|                                                       | No                             | 3.5%  | (3.0-3.9)   | 1    | -           |         | 1    | -           | 5793, 5393 |
|                                                       | Yes                            | 16.4% | (14.2-18.9) | 5.5  | (4.39-6.88) |         | 1.48 | (1.12-1.96) | 1395, 832  |
| <b>HIV test, past five years</b>                      |                                |       |             |      |             | <0.0001 |      |             | 0.001      |
|                                                       | Not in past five year/never    | 3.9%  | (3.4-4.4)   | 1    | -           |         | 1    | -           | 5264, 4891 |
|                                                       | In past five years             | 12.6% | (10.8-14.6) | 3.55 | (2.83-4.46) |         | 1.53 | (1.19-1.98) | 1547, 1010 |
| <b>STI diagnosis, past five years</b>                 |                                |       |             |      |             | <0.0001 |      |             | 0.001      |
|                                                       | No                             | 4.5%  | (4.0-5.0)   | 1    | -           |         | 1    | -           | 6797, 5994 |
|                                                       | Yes                            | 24.9% | (19.9-30.7) | 7.09 | (5.18-9.71) |         | 1.89 | (1.29-2.75) | 409, 237   |
| <b>Non-volitional sex, aged 13+, past five years</b>  |                                |       |             |      |             | <0.0001 |      |             | 0.6649     |
|                                                       | No                             | 5.0%  | (4.5-5.6)   | 1    | -           |         | 1    | -           | 6917, 6057 |
|                                                       | Yes                            | 19.3% | (12.6-28.4) | 4.53 | (2.70-7.61) |         | 1.14 | (0.64-2.04) | 155, 82    |
| <b>Risk perception</b>                                |                                |       |             |      |             |         |      |             |            |
| <b>HIV/AIDS risk: to self</b>                         |                                |       |             |      |             | <0.0001 |      |             | 0.0551     |
|                                                       | Greatly at risk / quite a lot  | 9.4%  | (6.0-14.3)  | 2.59 | (1.59-4.22) |         | 0.9  | (0.52-1.58) | 203, 162   |
|                                                       | Not very much                  | 12.0% | (10.3-14.0) | 3.42 | (2.75-4.25) |         | 1.34 | (1.04-1.72) | 1388, 1002 |
|                                                       | Not at all at risk             | 3.8%  | (3.4-4.4)   | 1    | -           |         | 1    | -           | 5630, 5082 |
| <b>Other STI risk: to self</b>                        |                                |       |             |      |             | <0.0001 |      |             | 0.0904     |
|                                                       | Greatly at risk / quite a lot  | 16.0% | (11.3-22.2) | 5.16 | (3.40-7.84) |         | 1.11 | (0.70-1.76) | 243, 169   |
|                                                       | Not very much                  | 11.2% | (9.7-12.9)  | 3.4  | (2.75-4.19) |         | 1.31 | (1.03-1.67) | 1579, 1116 |
|                                                       | Not at all at risk             | 3.6%  | (3.1-4.1)   | 1    | -           |         | 1    | -           | 5400, 4960 |

<sup>1</sup> Adjusted ORs adjusted for age (continuous), relationship status, ethnicity (White British vs. Other), social class, place of residence in Britain & partners in the past five years

<sup>2</sup> Denominators are for crude ORs

<sup>3</sup> NSSEC = National Statistics Socio-Economic Classification.[12]

<sup>4</sup> Recommended alcohol limits [\(21 units/week for men and 14 units/week for women\)](#) as defined by Royal College of Physicians [13]



**Web Appendix 3: Country/region of residence of new sexual partner(s) while overseas in the past 5 years, by participant's ethnicity**

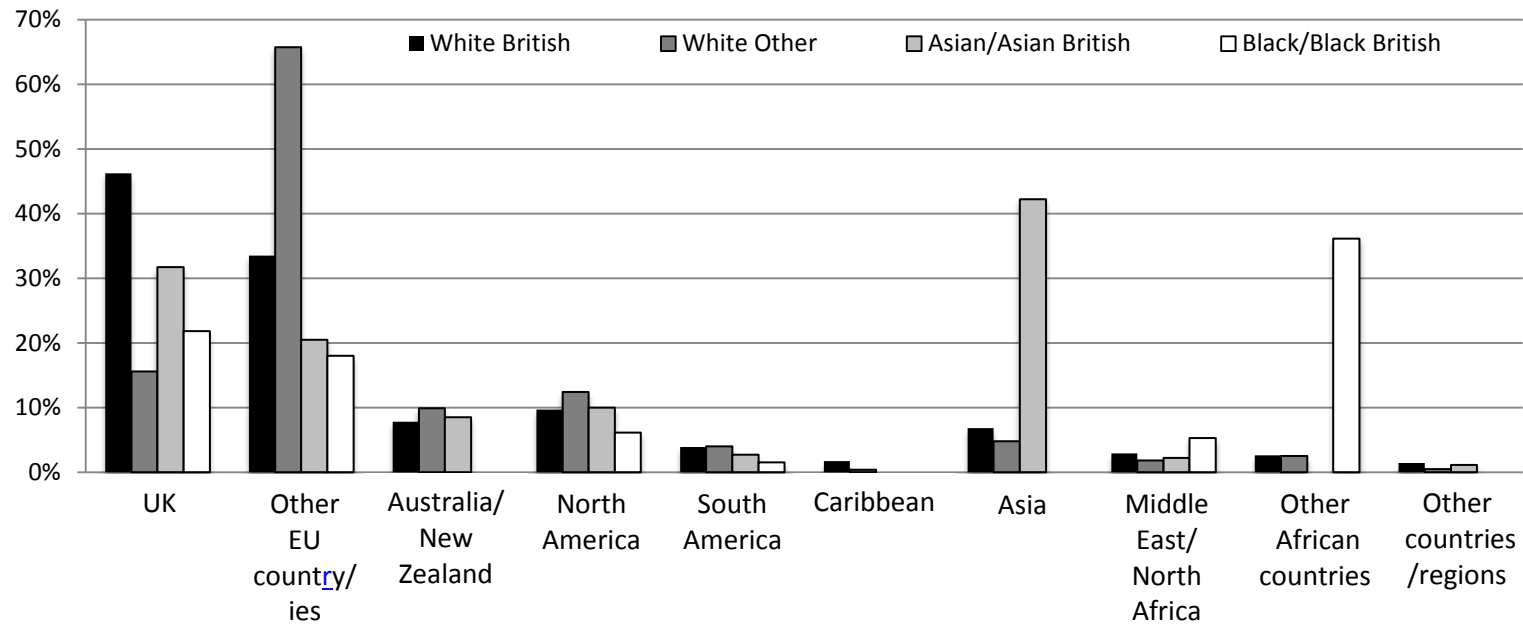

Percentages do not sum to 100% because respondents could report new partners from more than one country/region  
 Denominators too small for those self-identifying as 'Mixed' ethnicity or 'Chinese/Other' ethnicity
